# Supplementary material for: Genome-wide comparative analysis of DNA methylation between soybean cytoplasmic male-sterile line NJCMS5A and its maintainer NJCMS5B
Source: PubMed Central journal article supplement (PMC5557475; doi:10.1186/s12864-017-3962-5), 2017-08-10
Supplement: 12864_2017_3962_MOESM1_ESM.pdf [file 12864_2017_3962_MOESM1_ESM.pdf]

**a**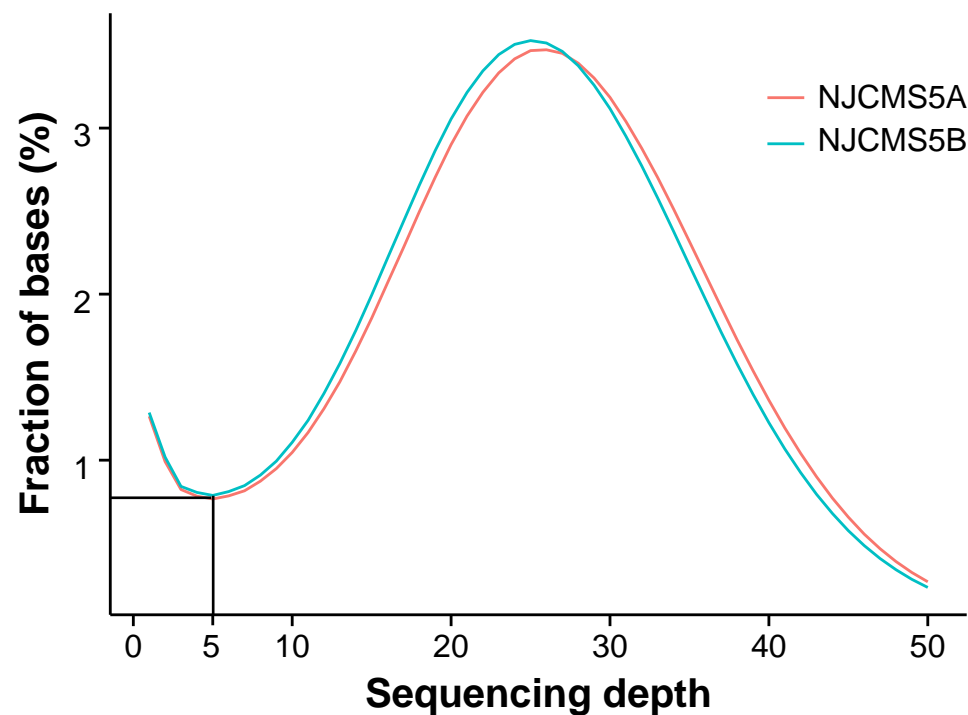**b**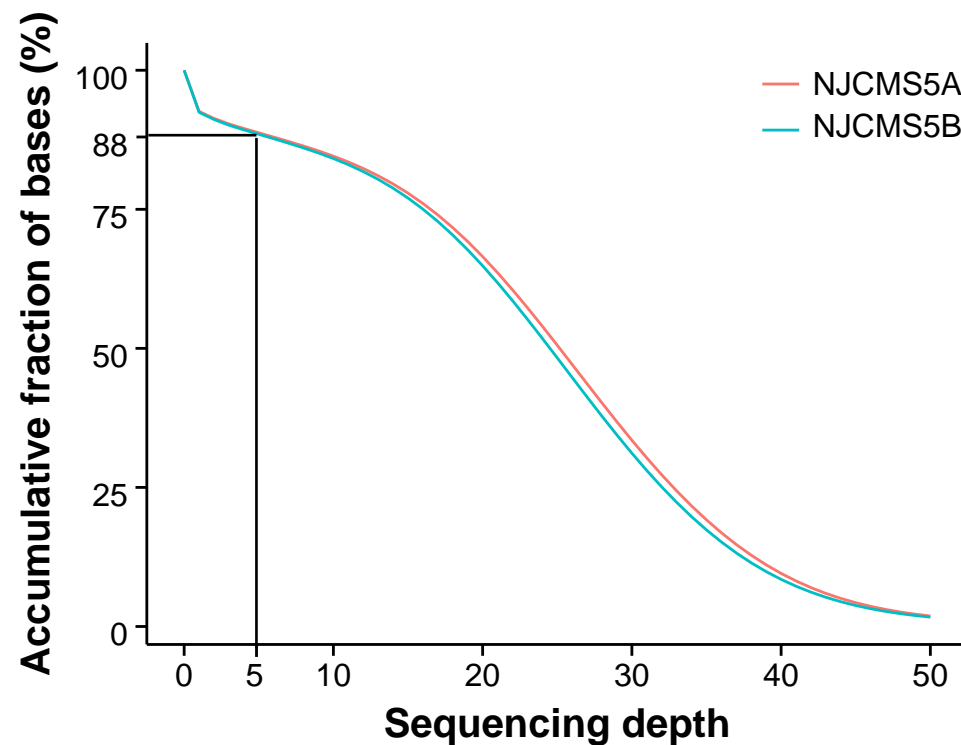

**Figure S1 Data analysis of soybean genome-wide methylation sequencing. (a)** Coverage of each single-base site on the genome both NJCMS5A and NJCMS5B; The x-axis represents the coverage of sequencing depth; the y-axis represents the percentage of each single-base site in the whole genome ( $Y_i$ ); **(b)** Accumulative coverage of genome sequencing both NJCMS5A and NJCMS5B; The y-axis represents the accumulative percentage of each signal-base site in the whole genome ( $Y_j$ )  $Y_j \geq Y_i$ .
