# Supplementary material for: Genome-wide comparative analysis of DNA methylation between soybean cytoplasmic male-sterile line NJCMS5A and its maintainer NJCMS5B
Source: PubMed Central journal article supplement (PMC5557475; doi:10.1186/s12864-017-3962-5), 2017-08-10
Supplement: 12864_2017_3962_MOESM2_ESM.pdf [file 12864_2017_3962_MOESM2_ESM.pdf]

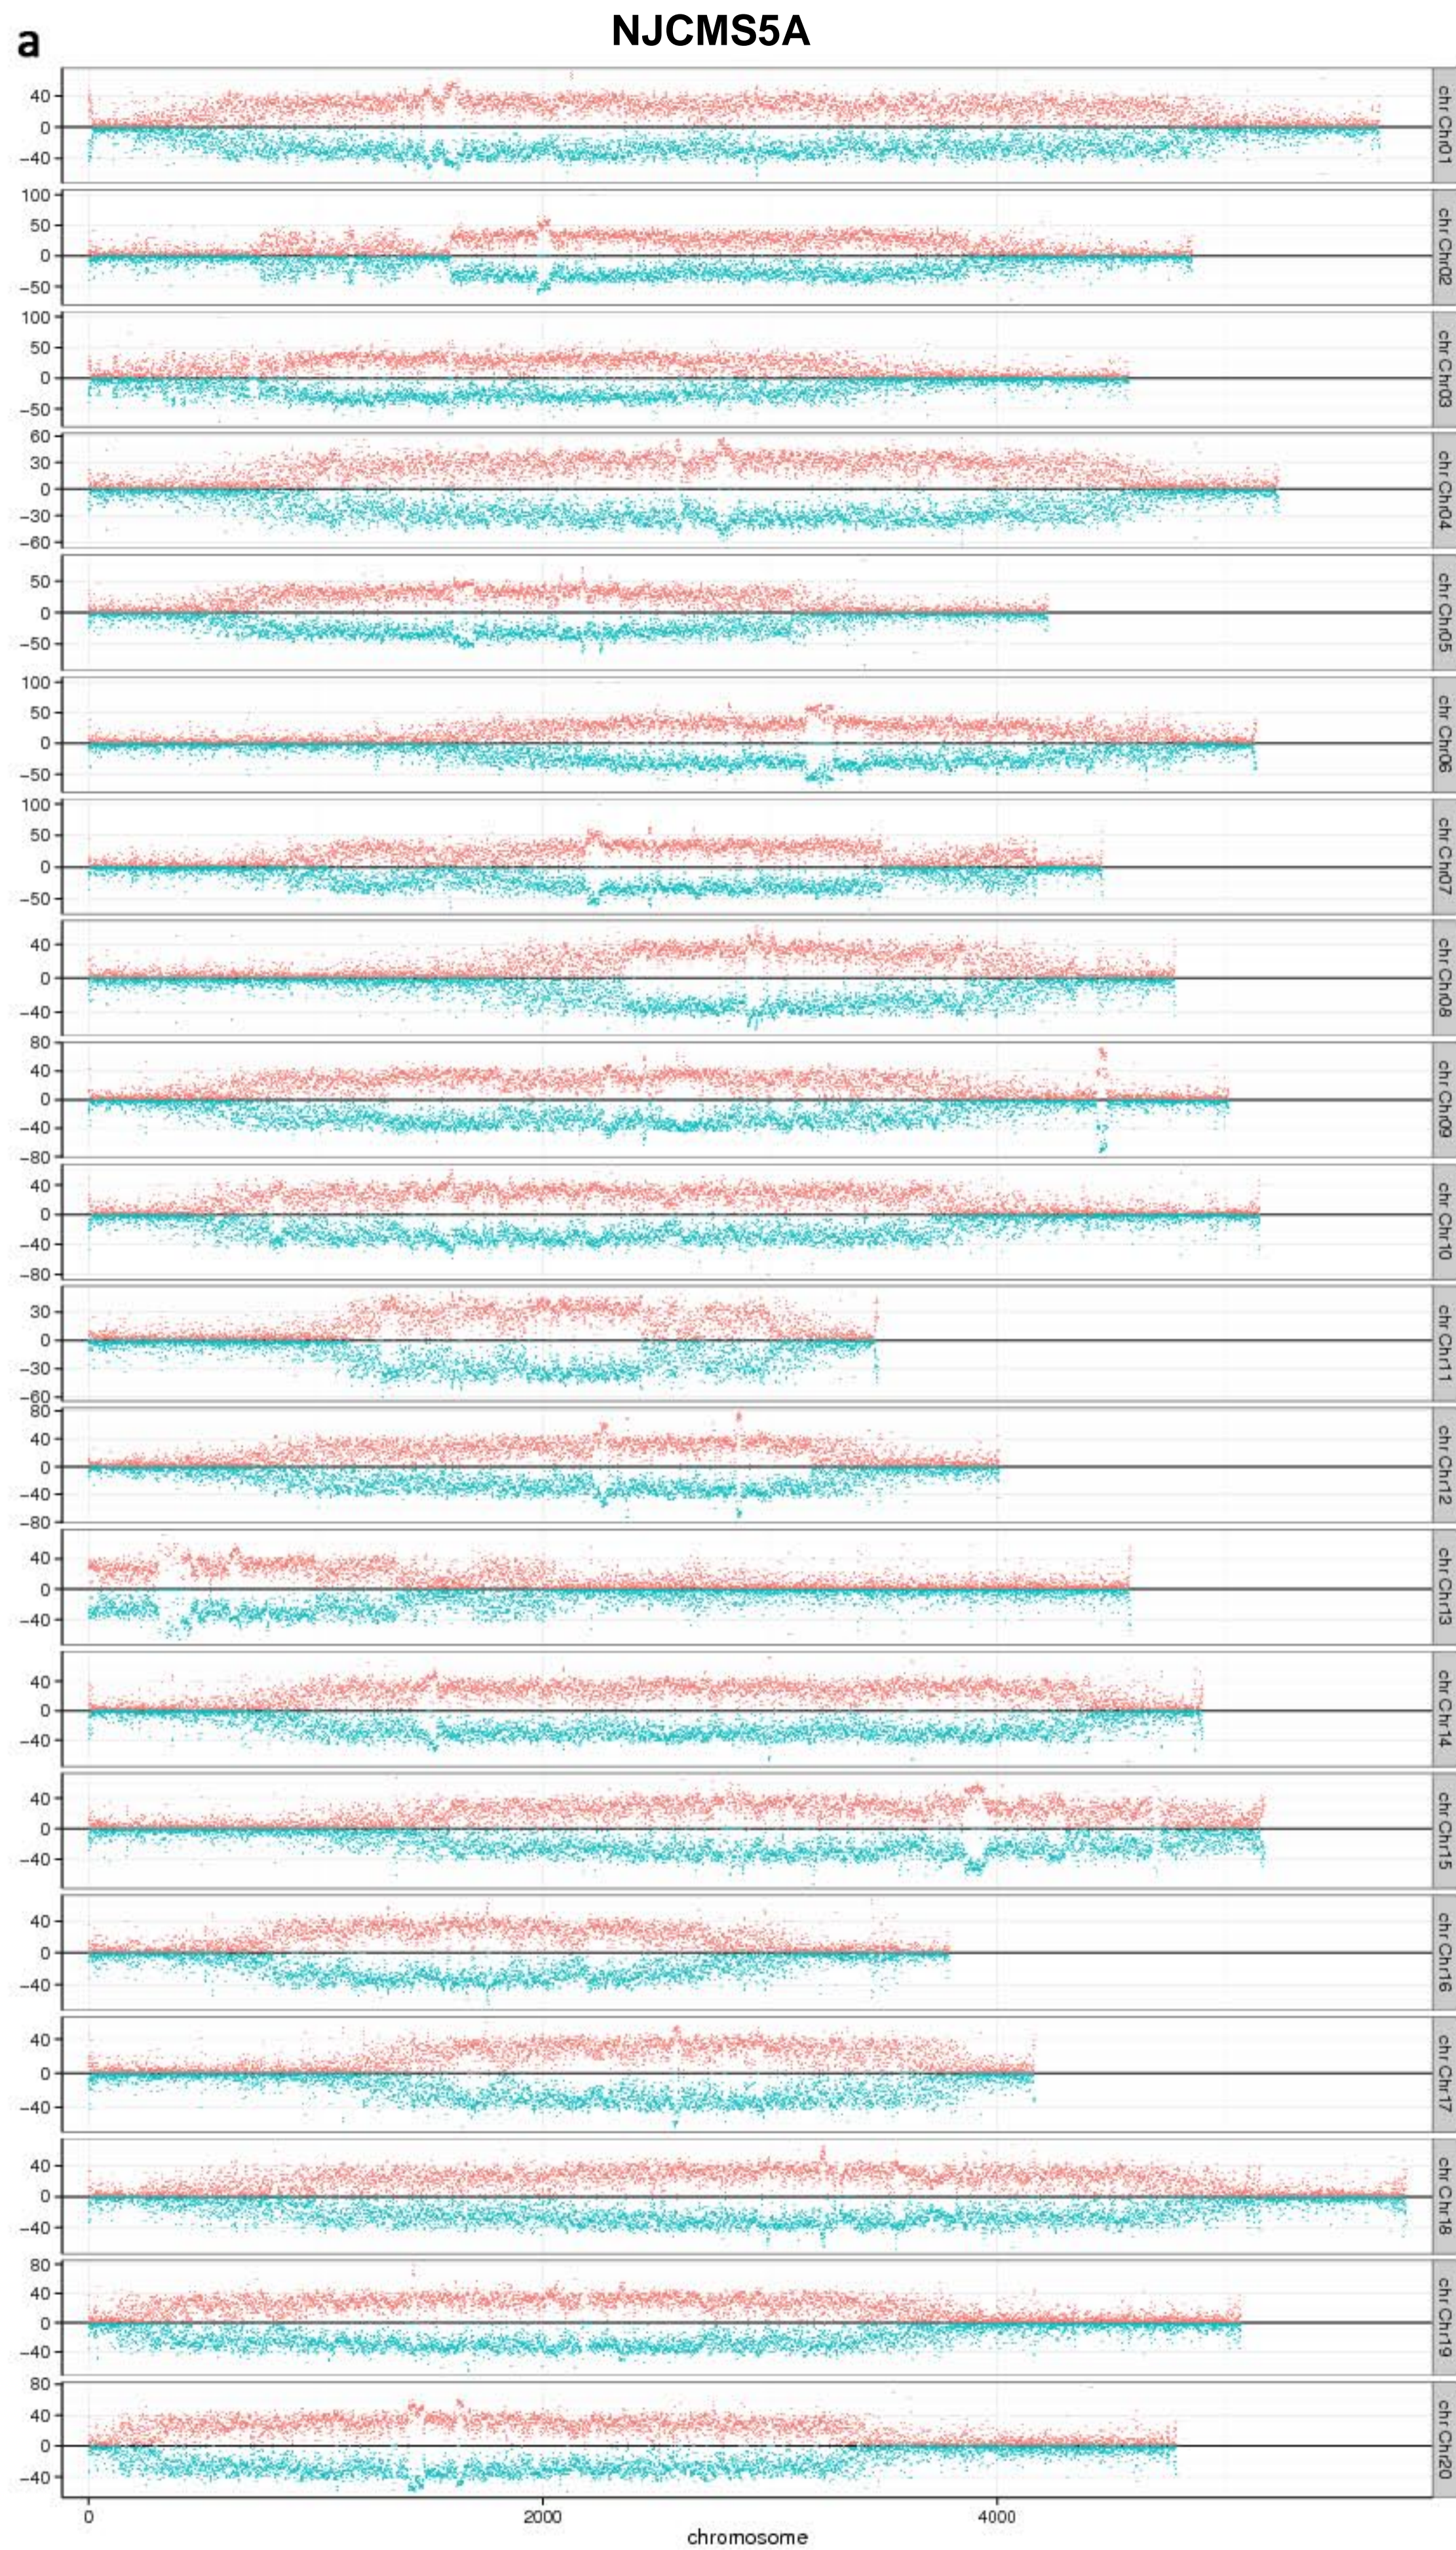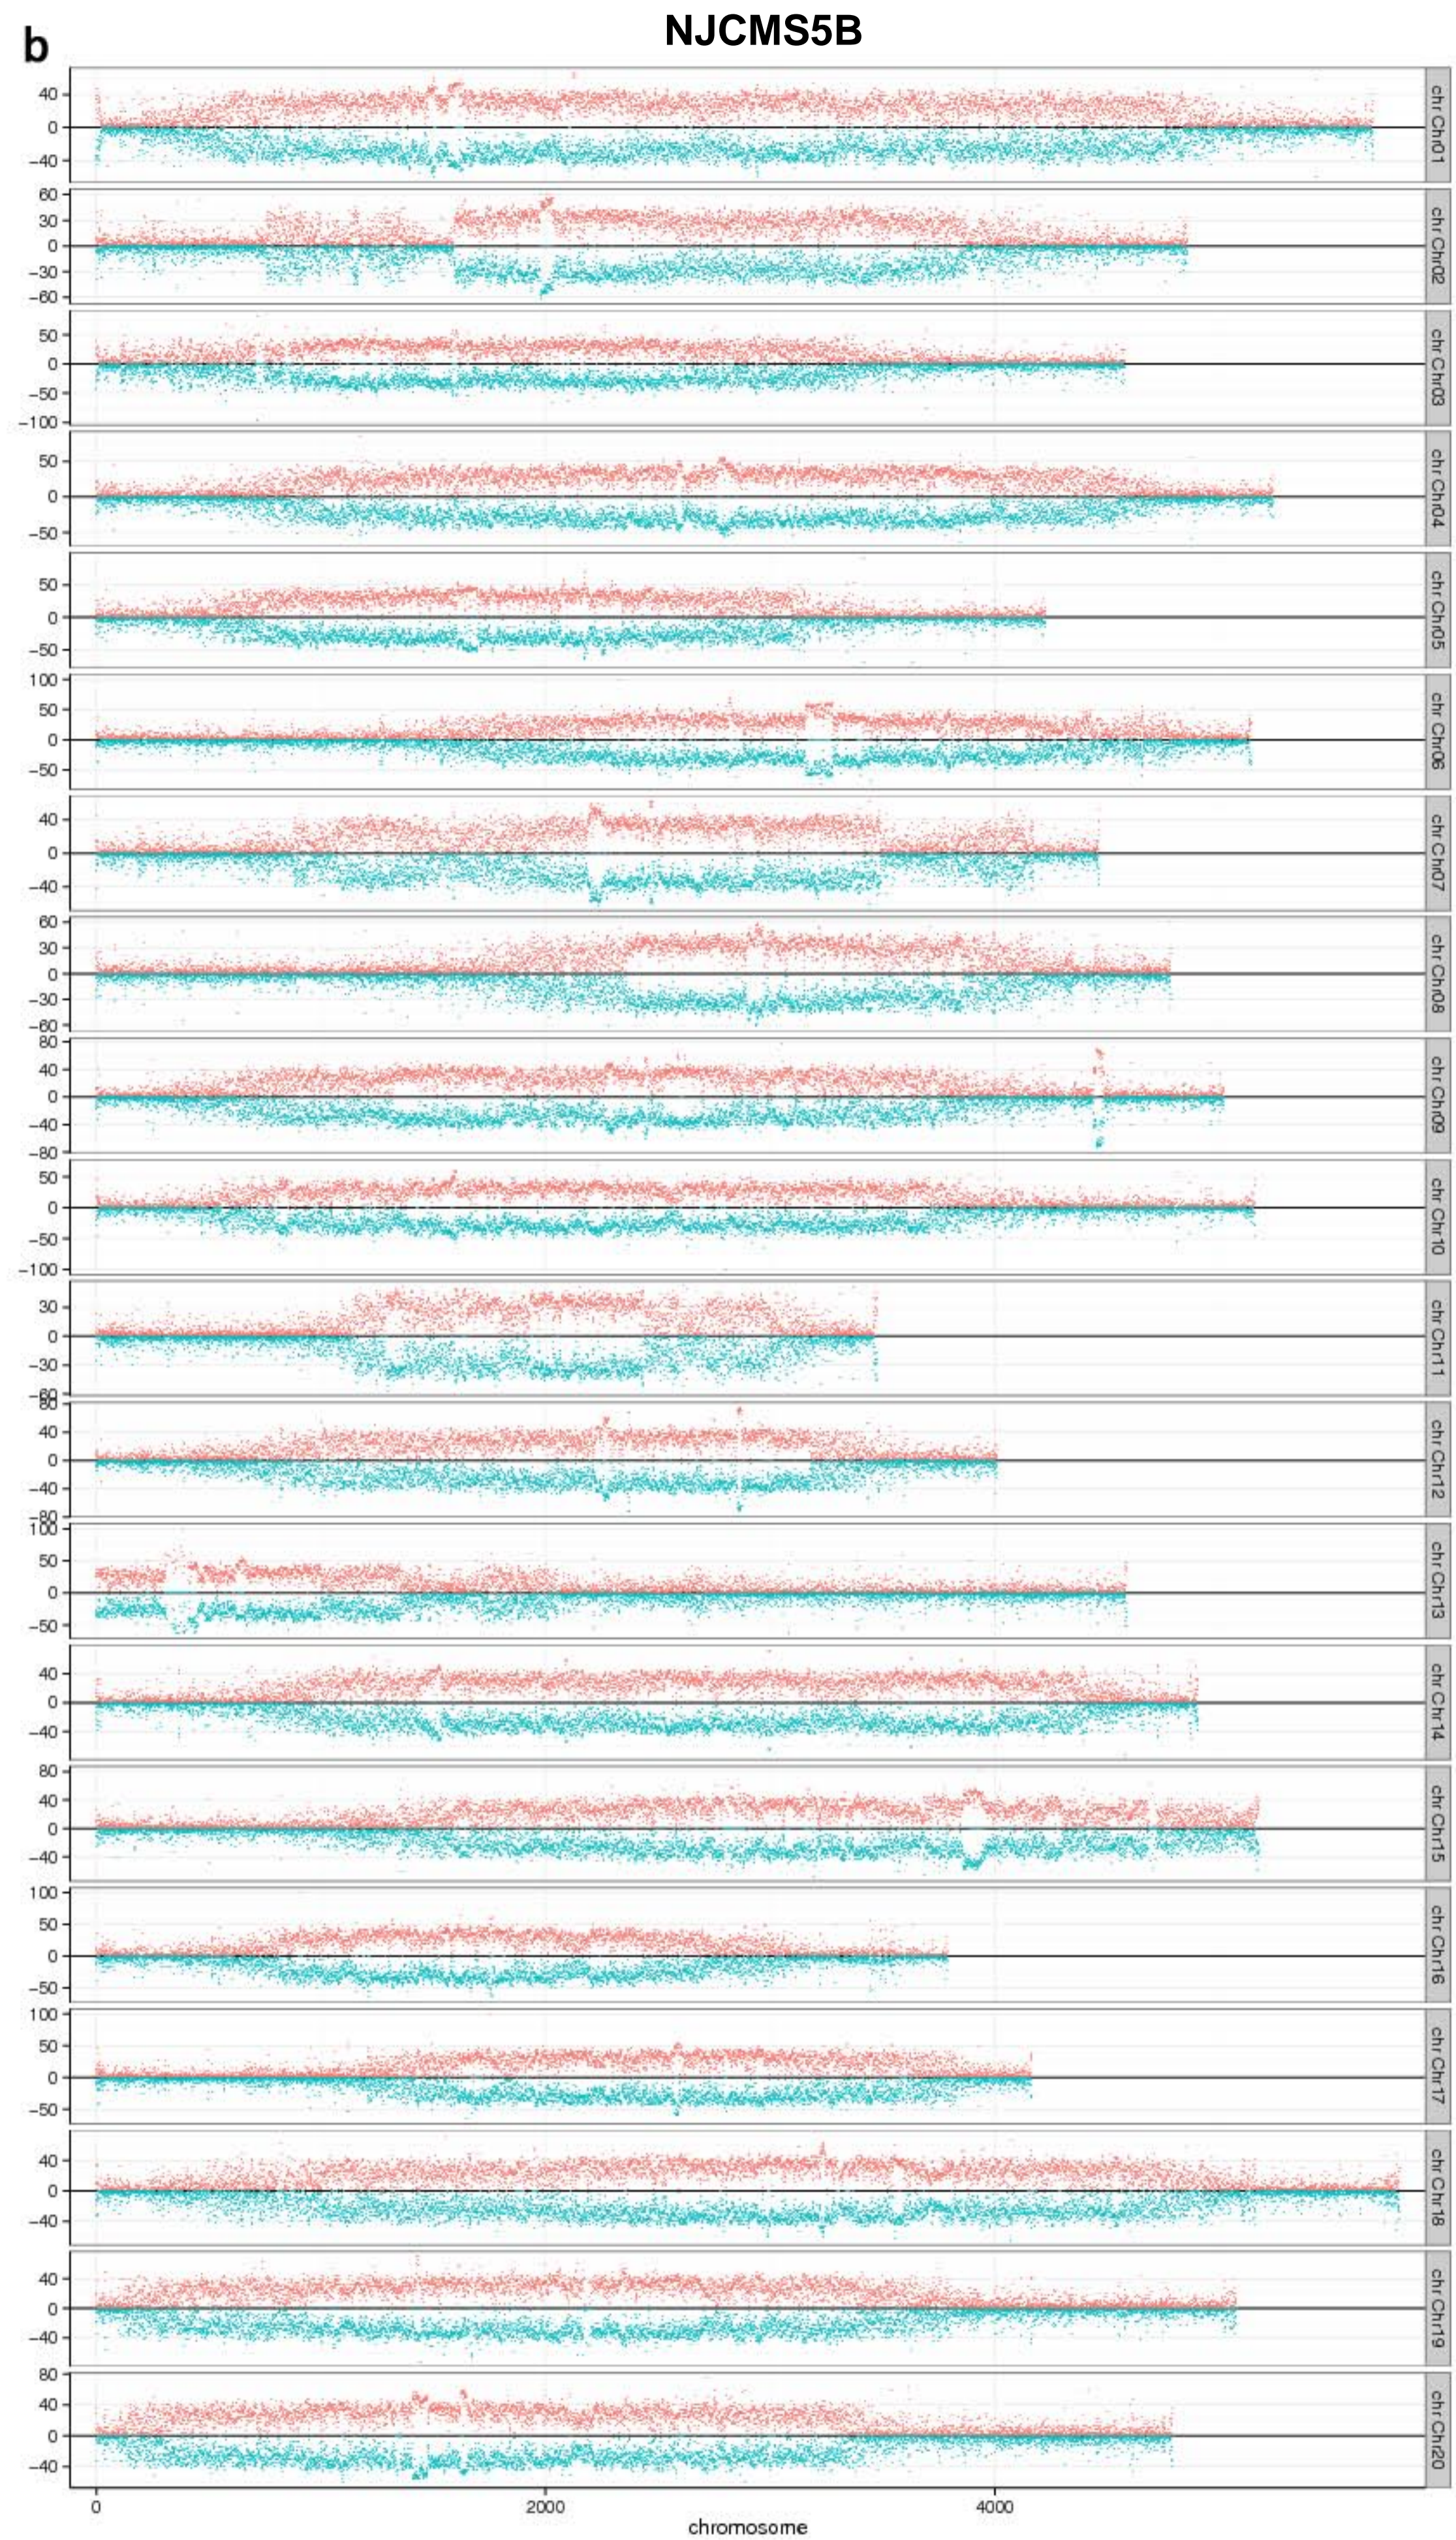

**Figure S2 Density distribution of genome-wide methylation in soybean chromosome. (a) NJCMS5A; (b) NJCMS5B.**

The red indicates positive chain; the green indicates negative chain. Sequencing reads were plotted in 10 kb windows along the chromosome.
